# Supplementary material for: SurvCNN: A Discrete Time-to-Event Cancer Survival Estimation Framework Using Image Representations of Omics Data
Source: Cancers (Basel). 2021 Jun 22;13(13):3106. doi: 10.3390/cancers13133106 (PMC8269306; doi:10.3390/cancers13133106)
Supplement: Supplementary file 1 [file cancers-13-03106-s001.zip › Additional_File1.xlsx]

## Sheet: S1
List of cancer-associated genes used to optimize the projections
Gene	Pathway	ID
C11orf30	cell_cycle	12
CCND1	cell_cycle	12
CCND2	cell_cycle	12
CCND3	cell_cycle	12
CCNE1	cell_cycle	12
CCNE2	cell_cycle	12
CDK12	cell_cycle	12
CDK2	cell_cycle	12
CDK4	cell_cycle	12
CDK6	cell_cycle	12
CDKN1B	cell_cycle	12
CDKN2A	cell_cycle	12
CDKN2B	cell_cycle	12
CDKN2C	cell_cycle	12
CHEK1	cell_cycle	12
CHEK2	cell_cycle	12
RB1	cell_cycle	12
TP53	cell_cycle	12
APC	WNT signaling	11
AXIN1	WNT signaling	11
BTRC	WNT signaling	11
CSNK1A1	WNT signaling	11
CTNNA1	WNT signaling	11
CTNNB1	WNT signaling	11
DVL1	WNT signaling	11
FZD1	WNT signaling	11
GSK3B	WNT signaling	11
LRP5	WNT signaling	11
LRP6	WNT signaling	11
WISP3	WNT signaling	11
WNT1	WNT signaling	11
WT1	WNT signaling	11
BCL2	apoptosis	10
ASXL1	Chromatin remodeling	9
DNMT3A	Chromatin remodeling	9
DOT1L	Chromatin remodeling	9
EZH2	Chromatin remodeling	9
IDH1	Chromatin remodeling	9
IDH2	Chromatin remodeling	9
IKZF1	Chromatin remodeling	9
KAT6A	Chromatin remodeling	9
KDM5A	Chromatin remodeling	9
KDM6A	Chromatin remodeling	9
KMT2D	Chromatin remodeling	9
MRE11A	Chromatin remodeling	9
MSH2	Chromatin remodeling	9
MSH6	Chromatin remodeling	9
SETD2	Chromatin remodeling	9
TET2	Chromatin remodeling	9
SRC	Cellular architecture	8
ATM	DNA damage/repair	7
ATR	DNA damage/repair	7
ATRX	DNA damage/repair	7
BRCA1	DNA damage/repair	7
BRCA2	DNA damage/repair	7
BRIP1	DNA damage/repair	7
C11orf30	DNA damage/repair	7
FANCA	DNA damage/repair	7
FANCC	DNA damage/repair	7
FANCD2	DNA damage/repair	7
FANCE	DNA damage/repair	7
FANCF	DNA damage/repair	7
FANCG	DNA damage/repair	7
FANCL	DNA damage/repair	7
MDM2	DNA damage/repair	7
MDM4	DNA damage/repair	7
MLH1	DNA damage/repair	7
MUTYH	DNA damage/repair	7
NPM1	DNA damage/repair	7
PALB2	DNA damage/repair	7
PPP2R1A	DNA damage/repair	7
RAD50	DNA damage/repair	7
RAD51	DNA damage/repair	7
STAG2	DNA damage/repair	7
GNA11	G-protein signaling	6
GNAQ	G-protein signaling	6
PTCH1	Hedgehog signaling	5
SMO	Hedgehog signaling	5
AR	Hormone signaling	4
ESR1	Hormone signaling	4
BTK	Immune checkpoints	3
IL7R	Immune checkpoints	3
IRF4	Immune checkpoints	3
MPL	Immune checkpoints	3
MYD88	Immune checkpoints	3

## Sheet: S2
Upregulated genes in high risk LUAD patients
FBXO8
KIAA1712
LSM6
ACVR1
ITGAV
XDH
ADCY7
ITPR2
C6orf174
LRRC3
MAP3K3
TTYH2
ZNF608
ANAPC5
ATP6V0A2
C12orf52
CDK2AP1
EIF2B1
MAPKAPK5
MGC14436
SFRS9
PHTF2
TPST1
C12orf24
RFC5
TMPO
UNG
CSRNP2
PFKM
RPAP3
SENP1
CCDC34
FANCF
GAS2
SAAL1
MYL6B
OBFC2B
C12orf48
CCDC138
GABPB1
GMNN
PRTFDC1
CDK2
CKAP2
DLEU2
PRIM1
RACGAP1P
RACGAP1
RFC3
ACRV1
PATE2
DNA2
TAF5
ZWINT
AGMAT
ESCO2
PBK
GAL
MTHFD2
STC2
C13orf34
C6orf195
FANCI
LOC100128191
BLM
ECT2
CDCA2
FAM40B
HK2
VWDE
C15orf23
OIP5
RAD51
SNRPA1
TIPIN
ZWILCH
BUB1B
C15orf41
DIAPH3
KIF23
NUSAP1
PRC1
WDR76
EXOSC9
H2AFZ
LARP7
SLBP
ARL6IP1
C4orf46
ELOVL6
LOC647946
MAD2L1
PMAIP1
CCNA2
CCNB2
CDK1
KIAA0101
MLF1IP
MND1
FANCB
PDK3
SMS
C11orf82
C18orf54
CENPO
CKAP2L
KIAA1524
SGOL2
TRIM59
UBA6
GINS4
MASTL
MCM4
PRKDC
C9orf40
CKS2
DBF4
POLR3G
SNRPD1
CCDC99
CENPN
DEPDC1
HMMR
NCAPG
NEIL3
RRM2
SPC25
SKA1
CENPI
IGF2BP3
KIF4B
NETO2
SHCBP1
SLC20A1
CDC25C
GNPNAT1
KIF20A
PTTG1
DMC1
DSC1
MCM6
SKA2
CDCA5
CHEK1
FEN1
MCM7
POLA2
SLC25A13
TRIB3
CDCA4
CDKN3
HPRT1
OTUB2
POLE2
PPIL5
VRK1
C1orf112
CENPA
CSTF3
GINS1
LOC399815
NEK2
NUF2
SKA3
FGFR4
RAPGEFL1
SEMA4G
ATP6V1C2
DNAH14
C21orf45
CHAF1B
DONSON
LOC440356

## Sheet: S3
Downregulated genes in high risk LUAD patients
BCHE
CORO2B
ELMOD1
WNT2B
IL28RA
LEFTY1
LEFTY2
ARHGEF37
PAX6
CACNA1S
SH3GL3
SPHKAP
SYN2
LOC401093
MBNL1
TMEM14E
NPR1
SLC27A3
BTBD9
STXBP1
TAPT1
ZNF238
ACOXL
AMIGO1
ESYT3
LONRF2
MYLIP
PLCH1
SLC47A1
GPD1L
FLJ35024
VLDLR
FLG2
FLG
HRNR
IFNA5
C2orf58
FAM82A1
HNMT
PUS10
TMEM50B
CCNJL
KCNS3
STK32A
CTSE
PDE4C
LRRK2
SDR16C5
SERPIND1
SFTPA1
SFTPA2
SLC2A13
SLC39A8
TMEM90A
ZNF385B
ARRB1
PCP4L1
SYTL3
C16orf89
C7orf41
ENTPD3
GLS2
SLC6A18
SMARCD3
TMEM163
NPC2
FNDC5
SHE
TDRD10
ZNF541
ADAM29
GLRA3
KHDRBS2
LIMCH1
MYOM1
PLA2G4F
SPIRE1
ACADSB
AFF3
ATP8A1
CACNA2D2
ITPKB
RICH2
SFXN2
TMEM108
TMEM132D
CACNB4
LRRC36
SLC1A2
FUT6
B3GNT9
CD81
CDKN1C
CST3
GPRC5C
SLC12A4
CCDC85A
FAM189A2
FHDC1
PRKCD
SGEF
SIAE
SLC1A1
VIPR1
VSIG2
HES5
PRMT8
WNT4
ALDH1L1
AWAT2
EDA
FAM155B
LMX1B
ASAP3
ASS1
TCEA3
BNIPL
EVPLL
FOLR1
FOXN1
NFE2
C9orf71
MUC1
SLC11A2
SUOX
KLF15
LINGO4
LONRF3
RORC
SELENBP1
SLC26A9
NELL1
TOX3
ACHE
ENPP3
HABP2
KLHDC7A
NRAP
BEND7
LARGE
B3GALT2
DOK6
KCTD8
MLC1
OTUD7A
PAPPA
RGAG1
RNF150
SAMD5
SETBP1
ARHGEF38
ATAD3C
C11orf52
C1orf210
FAAH
MT1IP
PRKCZ
PRR15L
SMPDL3B
TMEM125
RAB17
B4GALNT3
CAPN8
MLPH
TMEM63A
TSPAN3
NFIA
RPH3AL
SCNN1A
GFAP
PAX7
RGS17
SCN4A
SPP2
TRPM8
GK3P
GK
STON2
ZNF711
CHL1
PLA2G4A
PTGS2
LOC154822
VIPR2
C10orf57
FXYD4
FAM9B
HAL
INHA
BARX1
FST
PDE10A
SLC16A14
TBL1X
GEMIN8
OFD1
PHKA2
TRAPPC2
ZRSR2
CDK18
LOC284837
C11orf74
CETN4P
IFT46
C1orf203
LCA5L
LOC389705
SH3BGR
WRB
ZMYND12
C1orf88
C6orf217
TMPRSS7
FAM13AOS
MALAT1
PRO0628
C12orf71
GOLGA6L5
NEAT1
UBE2Q2P1
C9orf98
C9orf9
CDK20
C14orf174
OSCP1
TCTN1
TCTN2
KLHL3
MYOT
NPY6R
CELF6
FITM1
LBXCOR1
MMP21
SLC6A16
CN5H6.4

## Sheet: S4
COX (Concordance index for each omics combination)
mrna	meth	mirna	mrna_meth	mrna_mirna	mrna_meth_mirna	mrna_clinical	meth_clinical	mirna_clinical	mrna_meth_clinical	mrna_mirna_clinical	mrna_meth_mirna_clinical
0.441478	0.695157	0.452128	0.443231	0.448	0.521472	0.632094	0	0	0	0	0
0.622711	0.603715	0.655488	0.477723	0.541985	0.568966	0.527352	0	0	0	0	0
0.547529	0.626761	0.438903	0.59607	0.542781	0.631124	0.579422	0	0	0	0	0
0.529644	0.587571	0.570997	0.571429	0.521739	0.555233	0.478448	0	0	0	0	0
0.512281	0.553846	0.423221	0.565333	0.575758	0.60479	0.59745	0	0	0	0	0
0.505882	0.491342	0.676815	0.587302	0.579946	0.480549	0.50813	0	0	0	0	0
0.641584	0.553086	0.495885	0.501333	0.497006	0.615741	0.4859	0	0	0	0	0
0.572707	0.34	0.665768	0.456667	0.450292	0.512881	0.645291	0	0	0	0	0
0.594595	0.470284	0.639437	0.601719	0.571906	0.666667	0.5625	0	0	0	0	0
0.569959	0.722561	0.669444	0.417344	0.527059	0.565714	0.569231	0	0	0	0	0

## Sheet: S5
CoxNNet (Concordance index for each omics combination)
mrna	meth	mirna	mrna_meth	mrna_mirna	mrna_meth_mirna	mrna_clinical	meth_clinical	mirna_clinical	mrna_meth_clinical	mrna_mirna_clinical	mrna_meth_mirna_clinical
0.625175	0.60151	0.680618	0.657346	0.594798	0.621387	0.623772	0.600671	0.701223	0.657346	0.583237	0.655491
0.660858	0.571987	0.627982	0.630332	0.61194	0.649254	0.660411	0.557003	0.612508	0.631009	0.610583	0.588874
0.657169	0.580314	0.577743	0.653029	0.628782	0.673801	0.653033	0.585749	0.556942	0.668969	0.619926	0.658303
0.652315	0.582885	0.57774	0.616031	0.584022	0.571166	0.653241	0.585038	0.554791	0.616031	0.583104	0.596878
0.602681	0.527725	0.578911	0.633833	0.525622	0.665447	0.608733	0.530274	0.571927	0.633119	0.595168	0.65593
0.639163	0.691051	0.692958	0.519853	0.566038	0.612858	0.640906	0.677821	0.657277	0.519853	0.563242	0.60587
0.603233	0.636029	0.645751	0.608854	0.607903	0.645897	0.602711	0.647672	0.668785	0.608854	0.596505	0.596505
0.588542	0.71314	0.696816	0.694524	0.630347	0.645682	0.585938	0.712523	0.696816	0.694524	0.632768	0.625504
0.620944	0.677215	0.625379	0.656066	0.572773	0.57567	0.625369	0.688147	0.612235	0.655477	0.572773	0.610427
0.592661	0.659574	0.635251	0.627023	0.549967	0.583058	0.608716	0.632666	0.622399	0.627023	0.560556	0.565189
0.622167	0.626184	0.580663	0.542986	0.607843	0.603268	0.617734	0.618942	0.580663	0.543741	0.602614	0.54902
0.574458	0.647597	0.637812	0.639498	0.651306	0.670507	0.592837	0.639016	0.684211	0.638871	0.641321	0.608295
0.694862	0.643617	0.581649	0.584581	0.456832	0.611206	0.70109	0.652482	0.579575	0.585136	0.424814	0.688393
0.649811	0.627201	0.609507	0.598765	0.608312	0.622166	0.652174	0.62963	0.585439	0.599383	0.609572	0.667506
0.561889	0.611007	0.562644	0.642121	0.539873	0.547468	0.554232	0.612258	0.619523	0.642121	0.540506	0.58038

## Sheet: S6
COxPH and RSF (Concordance index for each omics combination)
Set	mrna	mrna_clinical	mirna	mirna-clinical	meth	meth-clinical	mrna-meth	mrna-meth-clinical	mrna-mirna	mrna-mirna-clinical	mrna-meth-mirna	mrna-meth-mirna-clinical
mean	0.553837	0.558582	0.568809		0.564432		0.521815		0.525647		0.572314
CV 10	0.441478	0.632094	0.452128	matrix inversion error	0.695157	matrix inversion error	0.443231		0.448		0.521472
	0.622711	0.527352	0.655488		0.603715		0.477723		0.541985		0.568966
	0.547529	0.579422	0.438903		0.626761		0.59607		0.542781		0.631124
	0.529644	0.478448	0.570997		0.587571		0.571429		0.521739		0.555233
	0.512281	0.59745	0.423221		0.553846		0.565333		0.575758		0.60479
	0.505882	0.50813	0.676815		0.491342		0.587302		0.579946		0.480549
	0.641584	0.4859	0.495885		0.553086		0.501333		0.497006		0.615741
	0.572707	0.645291	0.665768		0.34		0.456667		0.450292		0.512881
	0.594595	0.5625	0.639437		0.470284		0.601719		0.571906		0.666667
	0.569959	0.569231	0.669444		0.722561		0.417344		0.527059		0.565714
Comment	penalizer = 0.1	penalizer = 0.1	penalizer = 0.1	penalizer = 0.1	penalizer = 0.1		penalizer = 0.1		penalizer = 0.1		penalizer = 0.1
PCA-features	380	380	164	ALL	316	316	333308		333163		333308163

## Sheet: S7
Random Forest (Concordance index for each omics combination)
mrna	meth	mirna	mrna_meth	mrna_mirna	mrna_meth_mirna	mrna_clinical	meth_clinical	mirna_clinical	mrna_meth_clinical	mrna_mirna_clinical	mrna_meth_mirna_clinical
0.595884	0.598993	0.632797	0.674123	0.63316	0.607163	0.562675	0.606544	0.639228	0.659888	0.593876	0.603697
0.652232	0.574496	0.607074	0.649526	0.661924	0.638889	0.633929	0.549122	0.601929	0.663735	0.620596	0.642954
0.620927	0.584792	0.47973	0.672157	0.647752	0.655859	0.673704	0.584188	0.535863	0.680659	0.673545	0.688283
0.64137	0.620226	0.555619	0.633075	0.598533	0.587534	0.658029	0.583109	0.546445	0.622093	0.581118	0.586618
0.620839	0.580892	0.558659	0.662865	0.608632	0.623994	0.610463	0.60828	0.569134	0.605845	0.619605	0.620337
0.610337	0.645136	0.640376	0.529304	0.607542	0.592179	0.624855	0.602335	0.587793	0.504884	0.613827	0.611732
0.589155	0.584559	0.615568	0.605215	0.659332	0.650986	0.580813	0.623162	0.644956	0.616131	0.672989	0.650986
0.557752	0.728563	0.710564	0.733718	0.622079	0.619662	0.562955	0.727946	0.674385	0.706628	0.582595	0.573731
0.597052	0.678736	0.596057	0.655091	0.490949	0.545257	0.659459	0.665517	0.593023	0.60565	0.491673	0.548154
0.592117	0.578849	0.654835	0.576355	0.615741	0.571429	0.58341	0.647685	0.630355	0.553835	0.593915	0.597884
